# Supplementary material for: Glucocorticoid activation of anti-inflammatory macrophages protects against insulin resistance
Source: PubMed Central journal article supplement (PMC10119112; doi:10.1038/s41467-023-37831-z), 2023-04-20
Supplement: 41467_2023_37831_MOESM1_ESM.pdf [file 41467_2023_37831_MOESM1_ESM.pdf]

# Glucocorticoid Activation of Anti-Inflammatory Macrophages Protects Against Insulin Resistance

## Supplementary Information

**Giorgio Caratti<sup>1, 11§</sup>, Ulrich Stifel<sup>1§</sup>, Bozhena Caratti<sup>1</sup>, Ali J.M. Jamil<sup>2,3</sup>, Kyoung-Jin Chung<sup>4</sup>, Michael Kiehntopf<sup>5</sup>, Markus H. Gräler<sup>6,7,8</sup>, Matthias Blüher<sup>9</sup>, Alexander Rauch<sup>2,10,#</sup> and Jan P. Tuckermann<sup>1,#,\*</sup>**

<sup>1</sup> Institute of Comparative Molecular Endocrinology, University of Ulm, Ulm, Germany

<sup>2</sup> Molecular Endocrinology & Stem Cell Research Unit, Department of Endocrinology and Metabolism, Odense University Hospital, Denmark

<sup>3</sup> Department of Clinical Research, University of Southern Denmark, Odense, Denmark

<sup>4</sup> Institute for Clinical Chemistry and Laboratory Medicine, University Hospital and Faculty of Medicine, Technical University Dresden, Dresden, Germany

<sup>5</sup> SG Sepsis Research Clinic for Anesthesiology and Intensive Care, Jena University Hospital, Germany

<sup>6</sup> Department of Anesthesiology and Intensive Care Medicine, Jena University Hospital, Jena, Germany

<sup>7</sup> Center for Molecular Biomedicine (CMB), Jena University Hospital, Jena, Germany

<sup>8</sup> Center for Sepsis Control and Care (CSCC), Jena University Hospital, Germany

<sup>9</sup> Department of Endocrinology and Nephrology, University of Leipzig, Germany

<sup>10</sup> Steno Diabetes Center Odense, Odense, Denmark

<sup>11</sup> Current address: NIHR Oxford Biomedical Research Centre, John Radcliffe Hospital, Oxford, UK OX3 9DU and Oxford Centre for Diabetes, Endocrinology and Metabolism, University of Oxford, Oxford, OX37LE, UK

\* Further information and requests should be directed to and will be fulfilled by the Lead Contact, Jan Tuckermann ([jan.tuckermann@uni-ulm.de](mailto:jan.tuckermann@uni-ulm.de)).

§ These authors contributed equally

# These authors jointly supervised this work and are corresponding authors.

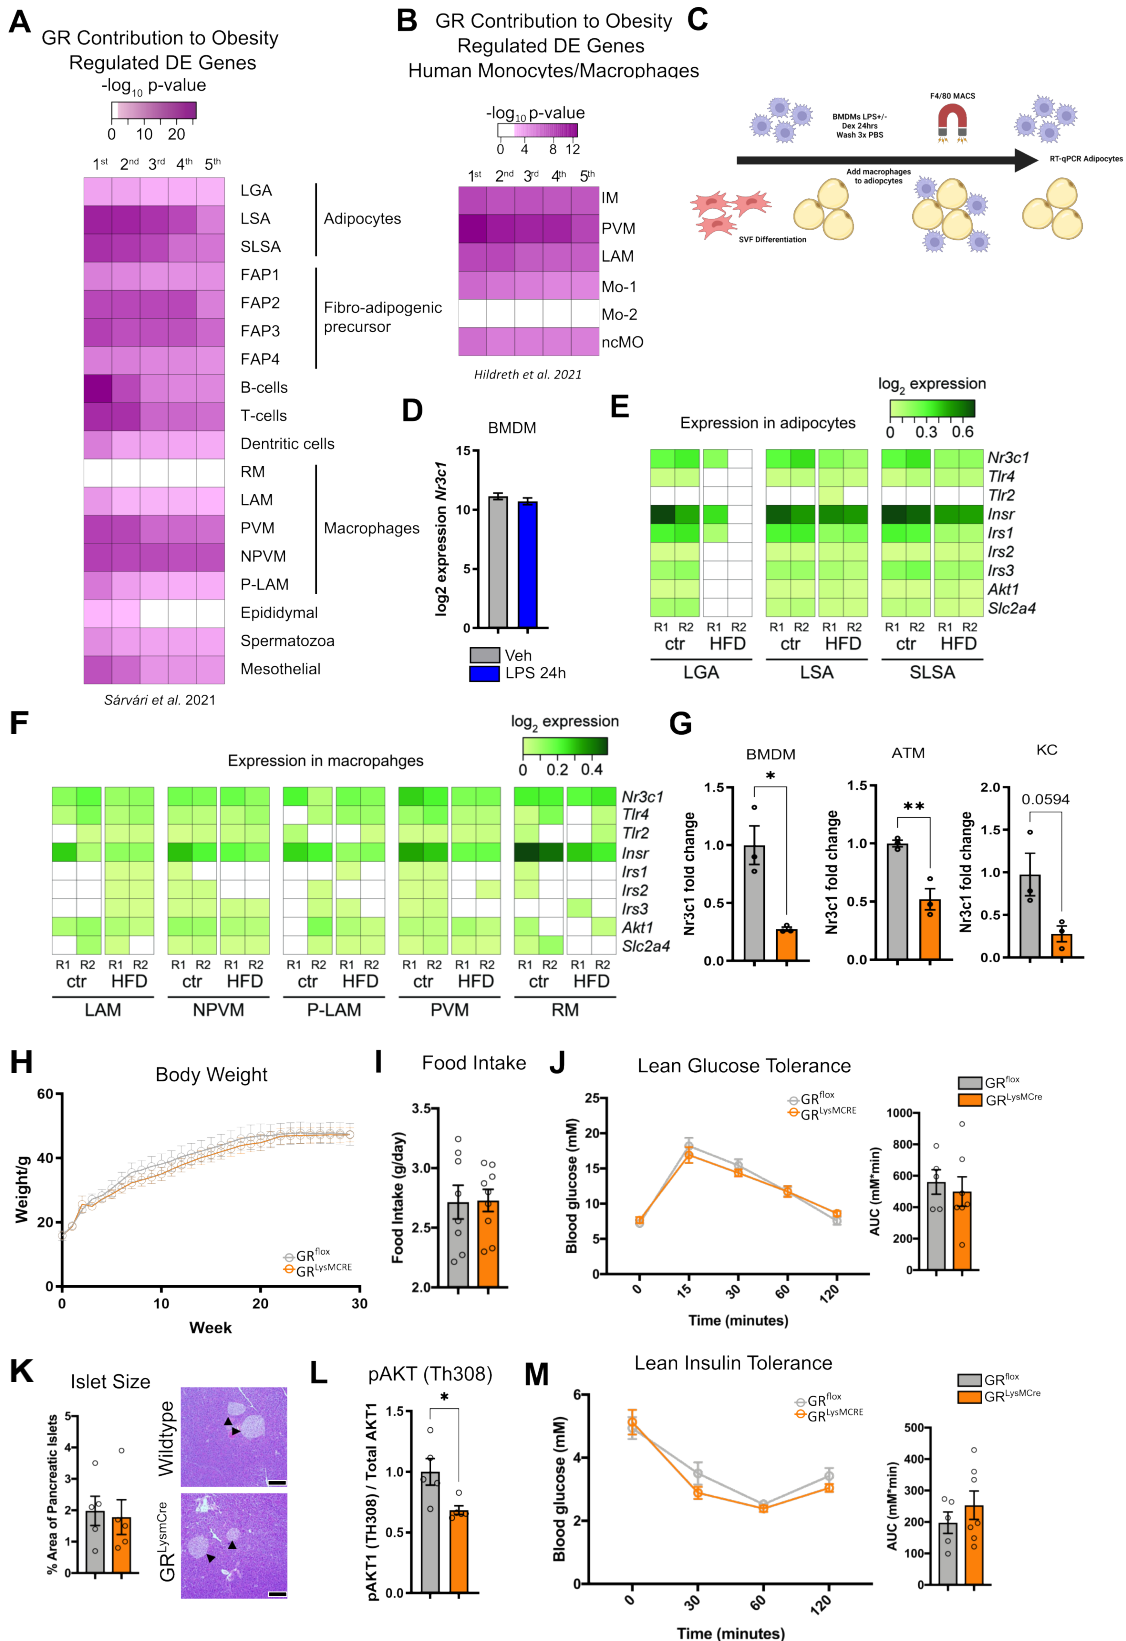

**Supplementary Figure 1. Related to Figure 1**

(A) Data from *Sárvári et al.*<sup>1</sup> were analysed, and genes induced by obesity were determined in each cell type and subjected to LISA analysis to estimate the prediction score of GR. fibro-adipogenic progenitors (FAPs), perivascular-like macrophages (PVM), non-perivascular-like

macrophages (NPVM), lipid-associated macrophages (LAM), proliferative LAM (P-LAM), collagen-expressing macrophages (CEM), regulatory macrophages (RM), lipogenic adipocytes (LGA), lipid-scavenging adipocytes (LSA), stressed lipid-scavenging adipocytes (SLSA). **(B)** Human monocyte and macrophage obesity regulated genes from *Hildreth et al.*<sup>2</sup> were analysed by LISA for GR enrichment. **(C)** Schematic representation of adipocyte-macrophage co-cultures. Created with Biorender.com **(D)** Gene expression of *Nr3c1* in BMDMs after LPS treatment. (N=2) **(E)** *Nr3c1* and *Tlr4*, *Tlr2*, *Insr*, *Irs1*, *Irs2*, *Irs3*, *Akt* and *Slc2a4* gene expression in adipocytes during chow and HFD. **(F)** *Nr3c1* and *Tlr4*, *Tlr2*, *Insr*, *Irs1*, *Irs2*, *Irs3*, *Akt* and *Slc2a4* gene expression in adipose tissue macrophages during chow and HFD **(G)** *Nr3c1* (GR) deletion was investigated via qPCR from indicated macrophage populations (BMDM = bone marrow derived macrophages, ATM = Adipose tissue resident macrophages, KC = Kupffer cells). (N=3) **(H)** GR<sup>fllox</sup> and GR<sup>LysMCre</sup> mice were subjected to 60% HFD for 29 weeks. Weight was monitored. **(I)** Food intake of mice on 60% HFD ((GR<sup>fllox</sup> N=8, GR<sup>LysMCre</sup> N=9)). **(J)** Lean GR<sup>fllox</sup> and GR<sup>LysMCre</sup> mice were fasted overnight, given 2 mg/kg glucose, and blood glucose levels were traced for 120 mins (GR<sup>fllox</sup> N=5, GR<sup>LysMCre</sup> N=7). **(K)** Pancreas was harvested from obese GR<sup>fllox</sup> and GR<sup>LysMCre</sup> mice, fixed and stained using H&E. Pancreatic islet size was quantified relative to total area of the image (N=5). **(L)** Baseline AKT phosphorylation was measured by ELISA from muscle of lean and obese GR<sup>fllox</sup> and GR<sup>LysMCre</sup> mice. (N=5) **(M)** Lean GR<sup>fllox</sup> and GR<sup>LysMCre</sup> mice were fasted overnight, and given 0.5  $\mu$  i.U./g insulin, blood glucose levels were traced for 120 mins (GR<sup>fllox</sup> N=5, GR<sup>LysMCre</sup> N=7). Original images at 10x magnification. Black arrows indicate islets. Data show mean  $\pm$ SEM. Statistical analysis by student's t-test or 2-way ANOVA with a Bonferroni post-hoc test or two-tailed student's T-test \*p < 0.05. Wilcoxon rank-sum test for A and B. Scale bar: 200 $\mu$ m in **K**.

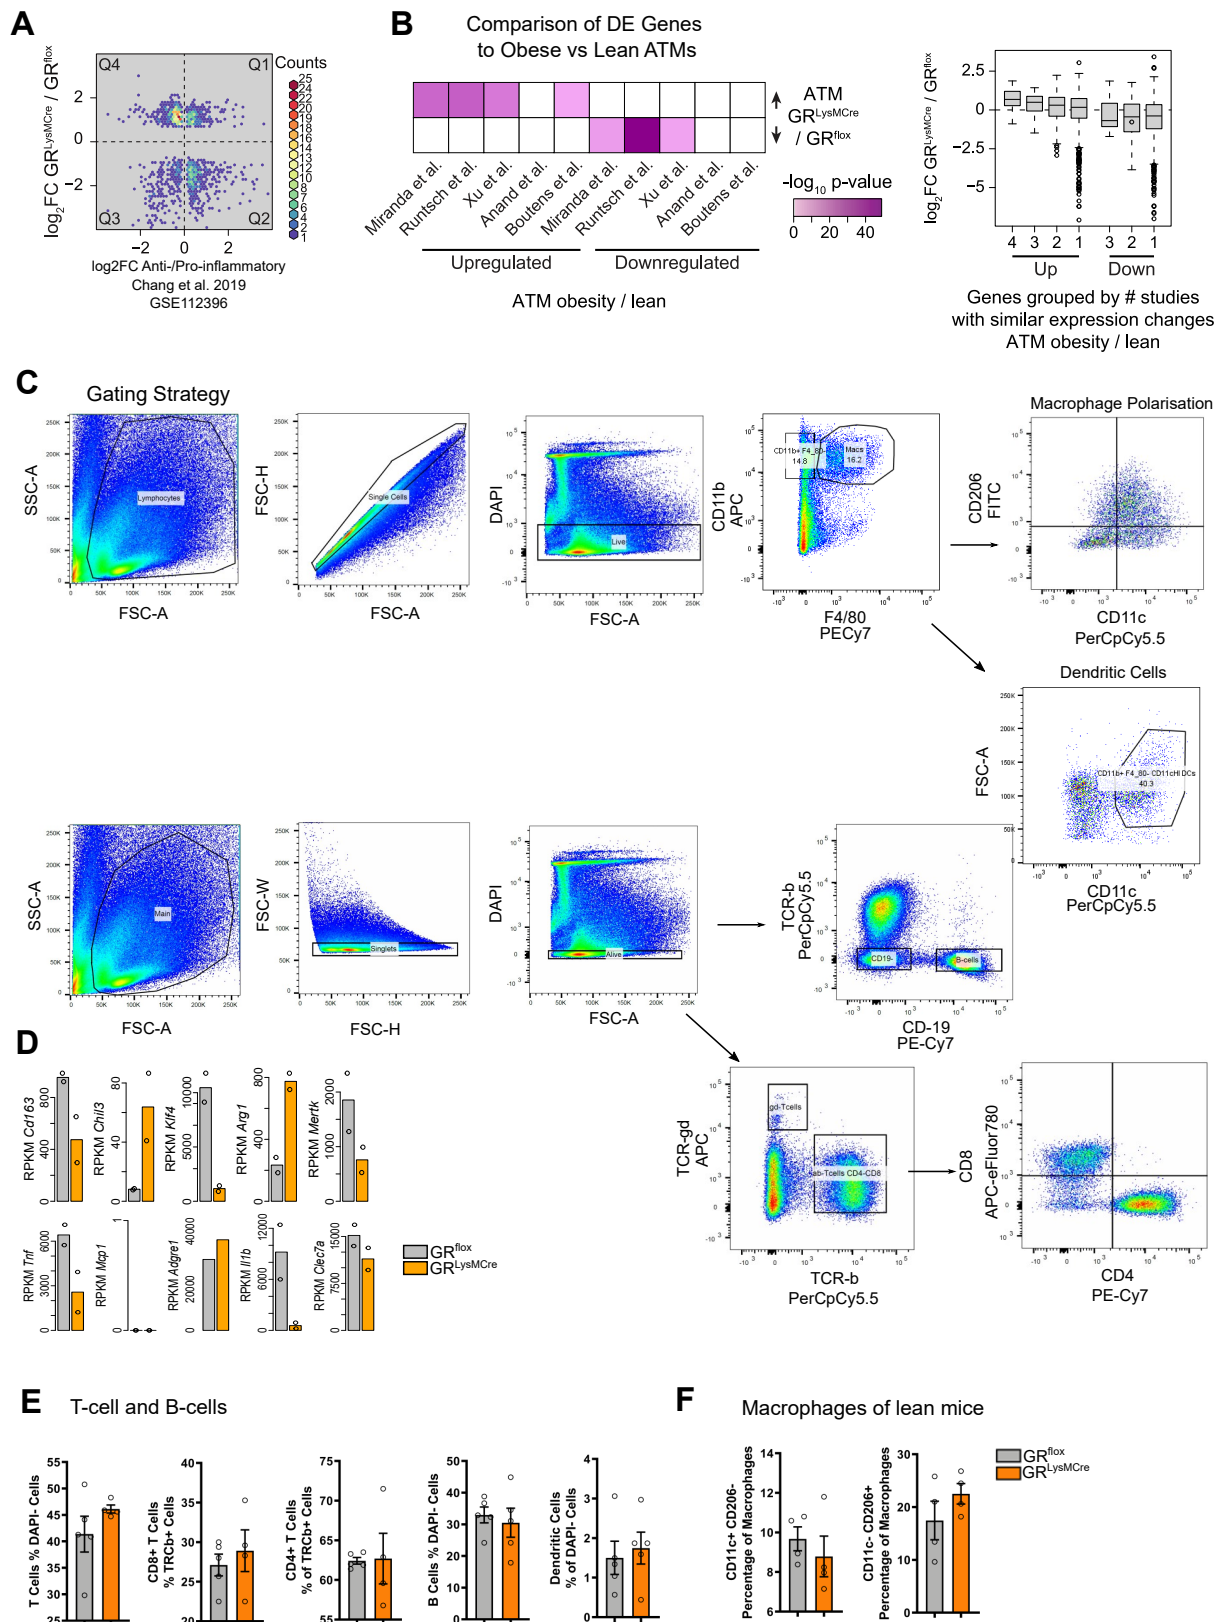

**Supplementary Figure 2. Related to Figure 2.**

(A) Scatterplot of genes differentially expressed between  $GR^{LysMCre}$  and  $GR^{lox}$  ATMs of obese mice from analysis shown in Fig. 2A compared to differentially expressed genes between anti- and pro-inflammatory ATMs from eWAT of obese mice (GSE112396)<sup>3</sup>. (B) Differentially



expressed genes between  $GR^{LysMCre}$  and  $GR^{flox}$  ATMs were compared to various published datasets of ATMs between lean and obese mice. Boxplots show median, IQR, 1.5xIQR and outlier values. (N=2) (C) FACS gating strategy of SVF from obese  $GR^{flox}$  and  $GR^{LysMCre}$  mice related to Fig.3. (D) Selected macrophage genes from RNASeq of RNA preparations of ATMs of obese  $GR^{LysMCre}$  and  $GR^{flox}$  mice (E) SVF T cell relative number, polarisation, B cell relative number and dendritic cell relative number quantified by FACS ( $GR^{flox}$  N=5,  $GR^{LysMCre}$  N=4). (F) SVF from lean  $GR^{flox}$  and  $GR^{LysMCre}$  mice was analysed for macrophage polarisation by FACS (N=4). Data show mean +/- SEM. Statistical analysis by two-tailed student's t-test.  $p < 0.001^{***}$ .

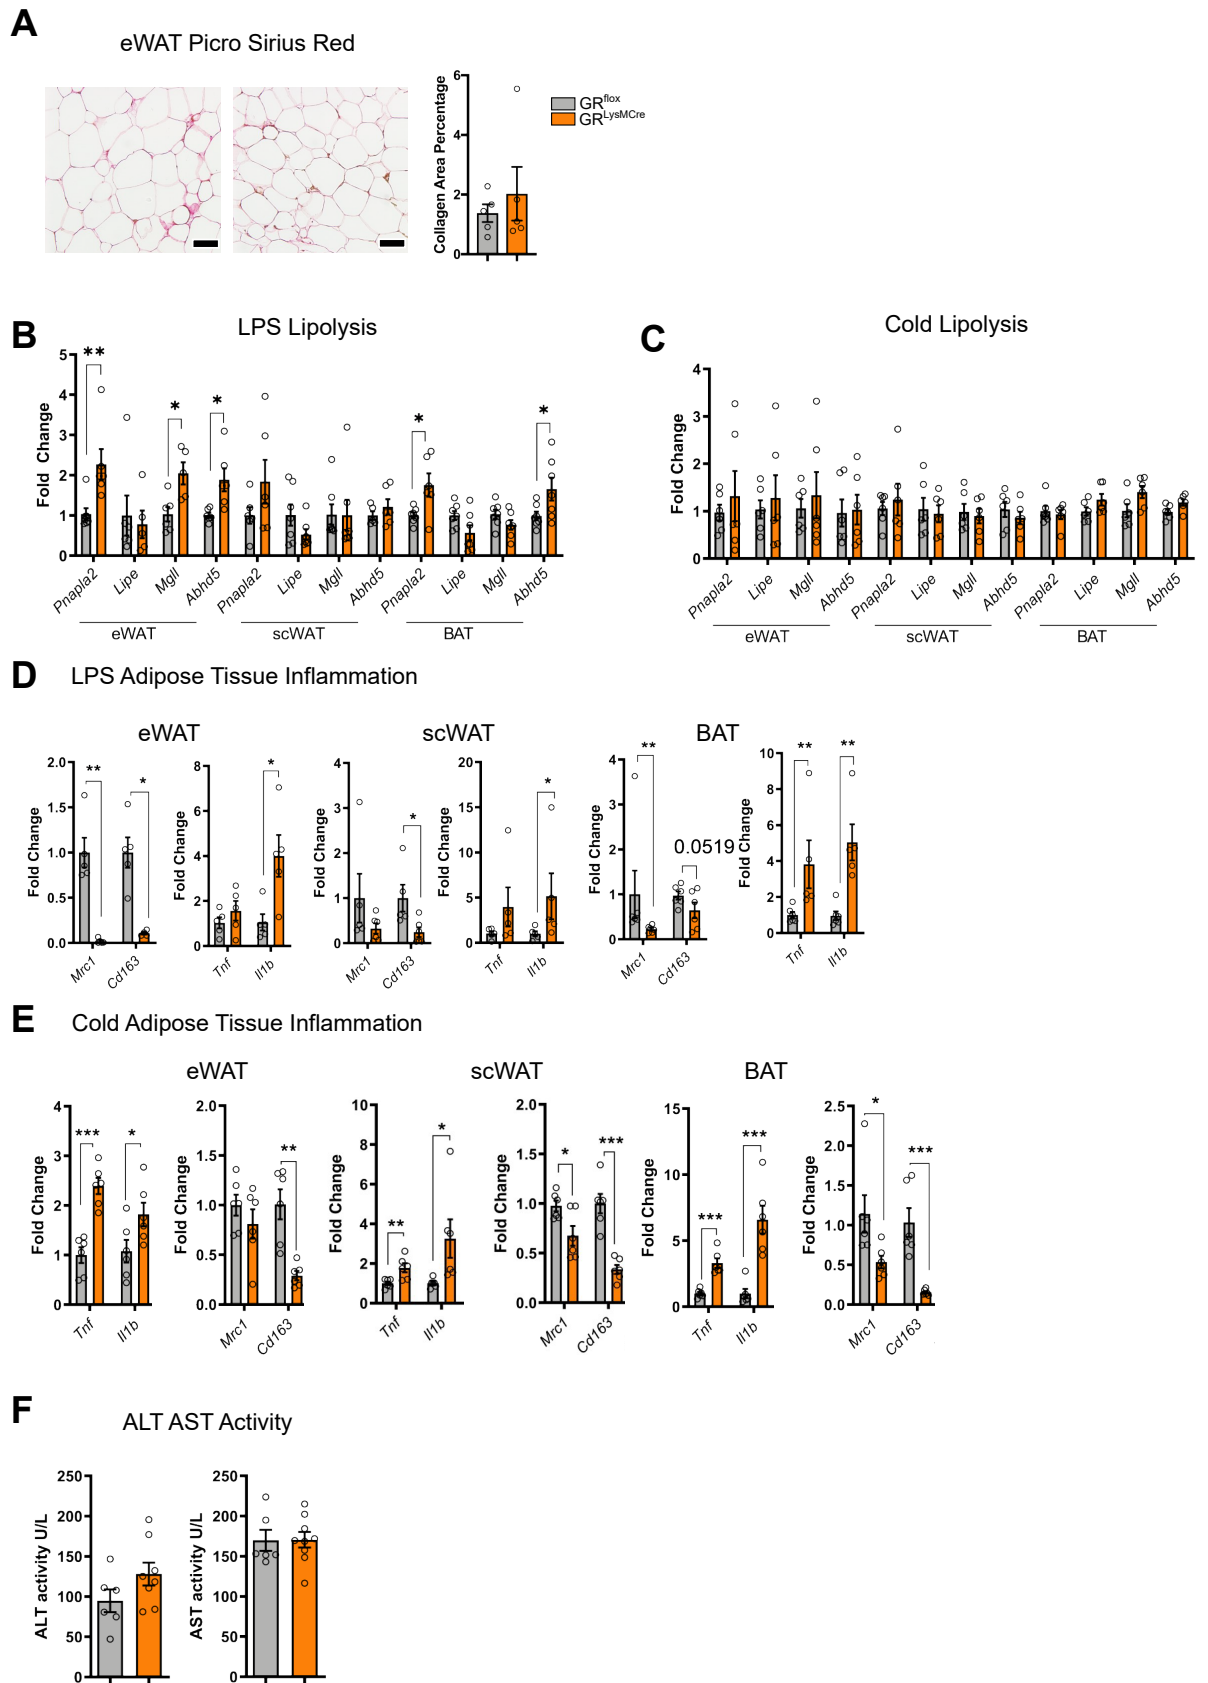

**Supplementary Figure 3. Relate Figure 3**

**A)** Picro sirius red staining of eWAT of obese  $GR^{lox}$  and  $GR^{LysMCre}$  mice (N=5). **(B)** Lean  $GR^{lox}$  and  $GR^{LysMCre}$  mice were subjected to endotoxin shock for 24 hours. RT-qPCR of lipolytic

markers (eWat GR<sup>flox</sup>: *Pnpla2* N=7, *Lipe* N=6, *Mgll* N=6, *Abhd5* N=6; GR<sup>LysMCre</sup>: *Pnpla2* N=6, *Lipe* N=5, *Mgll* N=5, *Abhd5* N=6; scWat GR<sup>flox</sup>: *Pnpla2* N=6, *Lipe* N=7, *Mgll* N=7, *Abhd5* N=5; GR<sup>LysMCre</sup>: *Pnpla2* N=6, *Lipe* N=7, *Mgll* N=7, *Abhd5* N=7; BAT GR<sup>flox</sup>: *Pnpla2* N=7, *Lipe* N=7, *Mgll* N=7, *Abhd5* N=7; GR<sup>LysMCre</sup>: *Pnpla2* N=7, *Lipe* N=7, *Mgll* N=7, *Abhd5* N=7) and (D) inflammation markers (eWat GR<sup>flox</sup>: *Mrc1* N=5, *Cd163* N=5, *Tnf* N=5, *Il1b* N=5; GR<sup>LysMCre</sup>: *Mrc1* N=5, *Cd163* N=5, *Tnf* N=5, *Il1b* N=5; scWat GR<sup>flox</sup>: *Mrc1* N=5, *Cd163* N=5, *Tnf* N=5, *Il1b* N=5; GR<sup>LysMCre</sup>: *Mrc1* N=6, *Cd163* N=6, *Tnf* N=5, *Il1b* N=5; BAT GR<sup>flox</sup>: *Mrc1* N=6, *Cd163* N=6, *Tnf* N=6, *Il1b* N=6; GR<sup>LysMCre</sup>: *Mrc1* N=6, *Cd163* N=6, *Tnf* N=5, *Il1b* N=6). (C) Obese GR<sup>flox</sup> and GR<sup>LysMCre</sup> mice were subjected to 4°C cold stress for 12 hours. RT-qPCR of lipolytic genes (N=6) and (E) inflammatory markers (N=6). (F) Serum ALT and AST measurement of obese GR<sup>flox</sup> and GR<sup>LysMCre</sup> mice (GR<sup>flox</sup> N=6, GR<sup>LysMCre</sup> N=8). Data show mean +/- SEM. Statistical analysis by two-tailed Student's t-test. p < 0.05\*, < 0.01\*\*, <0.001\*\*\*. Scale bar: 200µm in A.

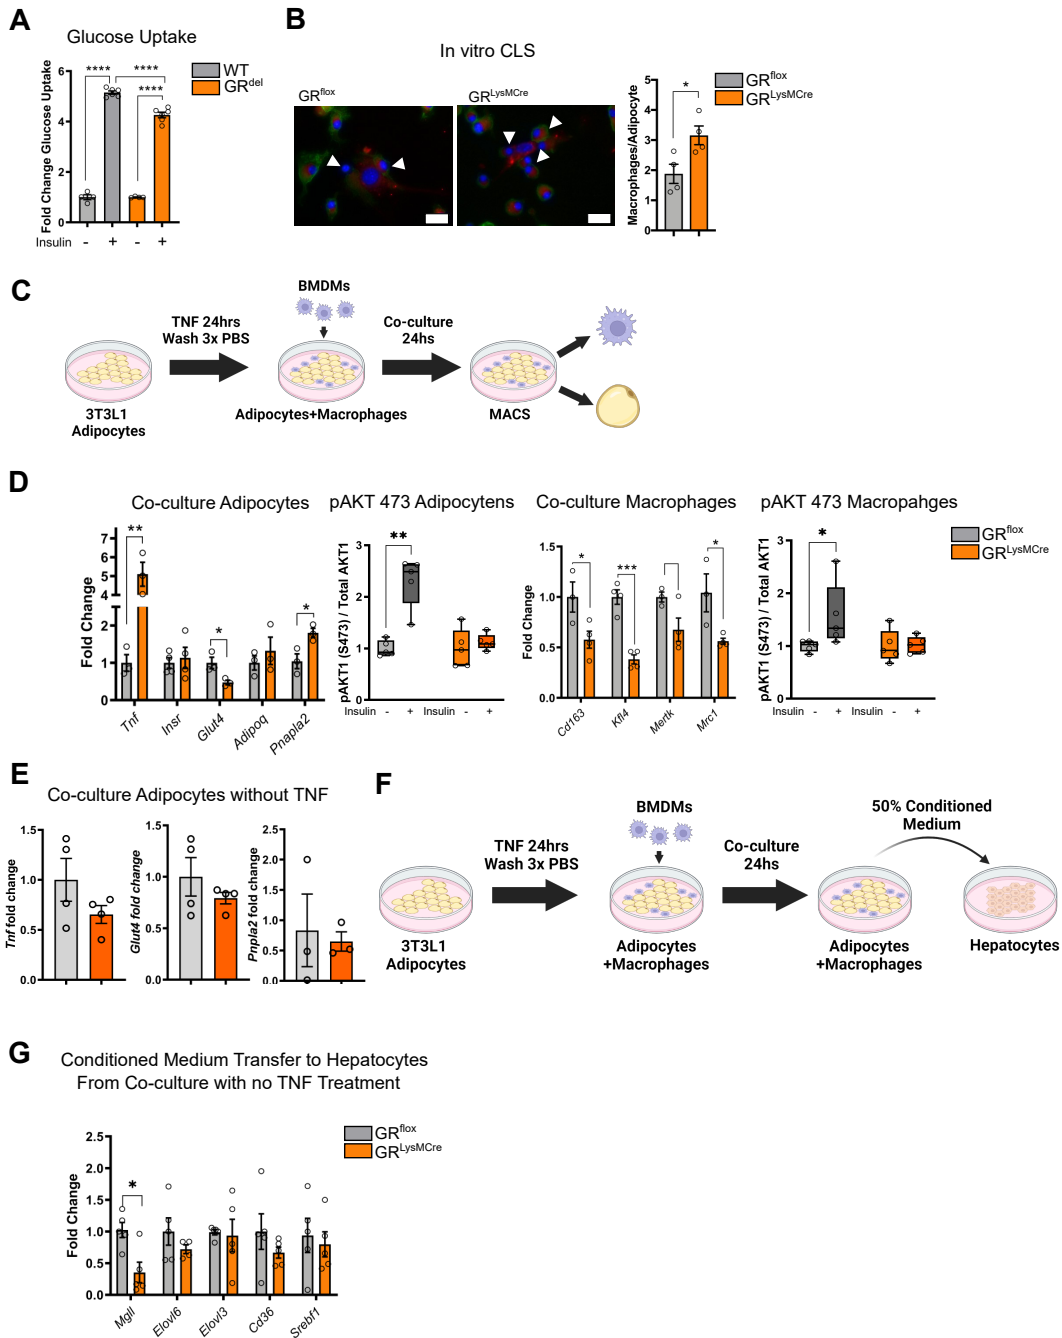

### Supplementary Figure 4. Related to Figure 3.

Differentiated 3T3L1 adipocytes were co-cultured with either WT or GR<sup>del</sup> fetal liver derived macrophages (FLDMs) and insulin stimulated glucose uptake assessed (WT N=4, GR<sup>del</sup> N=5) (B) Number of GR<sup>lox</sup> and GR<sup>LysMCre</sup> BMDMs contacting TNF pre-treated 3T3L1 adipocytes determined by IF of CD11b (green) and LipidTox (red) (N=4). (C) Cartoon depicting co-cultures of TNF pre-treated 3T3L1 adipocytes and either GR<sup>lox</sup> or GR<sup>LysMCre</sup> BMDMs. Created with Biorender.com (D) 3T3L1s cocultured with either GR<sup>lox</sup> or GR<sup>LysMCre</sup> macrophages as in S4C were separated by MACS and gene expression or AKT phosphorylation quantified by RT-qPCR (Adipocytes: GR<sup>lox</sup>: *Tnf* N=3, *Insr* N=4, *Glut4* N=3, *Adipoq* N=3, *Pnpla2* N=3; GR<sup>LysMCre</sup> *Tnf* N=3, *Insr* N=4, *Glut4* N=3, *Adipoq* N=3, *Pnpla2* N=3; pAKT Adipocytes N=5; Macrophages: GR<sup>lox</sup>: *Cd163* N=3, *Klf4* N=4, *Mertk* N=3, *Mrc1* N=3; GR<sup>LysMCre</sup> *Cd163* N=4, *Klf4* N=4, *Mertk* N=4, *Mrc1* N=4; pAKT Macrophages N=5). (E) 3T3L1 adipocytes were co-cultured with BMDMs without TNF pretreatment (GR<sup>lox</sup>: *Tnf* N=4, *Glut4* N=4, *Pnpla2* N=3; GR<sup>LysMCre</sup>

*Tnf* N=4, *Glut4* N=4, *Pnpla2* N=3). (F) Cartoon depiction of co-culture conditioned medium transfer to hepatocytes. Created with Biorender.com (G) Primary hepatocytes were treated with co-culture conditioned medium without TNF pre-treatment of adipocytes (N=5). Data show mean  $\pm$ SEM. Boxplots show median, IQR and min/max values. Statistical analysis two-tailed students t-test (B, D, G), two-way ANOVA with a Sidak post-hoc test (A).  $p < 0.05^*$ ,  $p < 0.01^{**}$ ,  $p < 0.001^{***}$  images at 40x original magnification. Scale bar: 25 $\mu$ m in B.

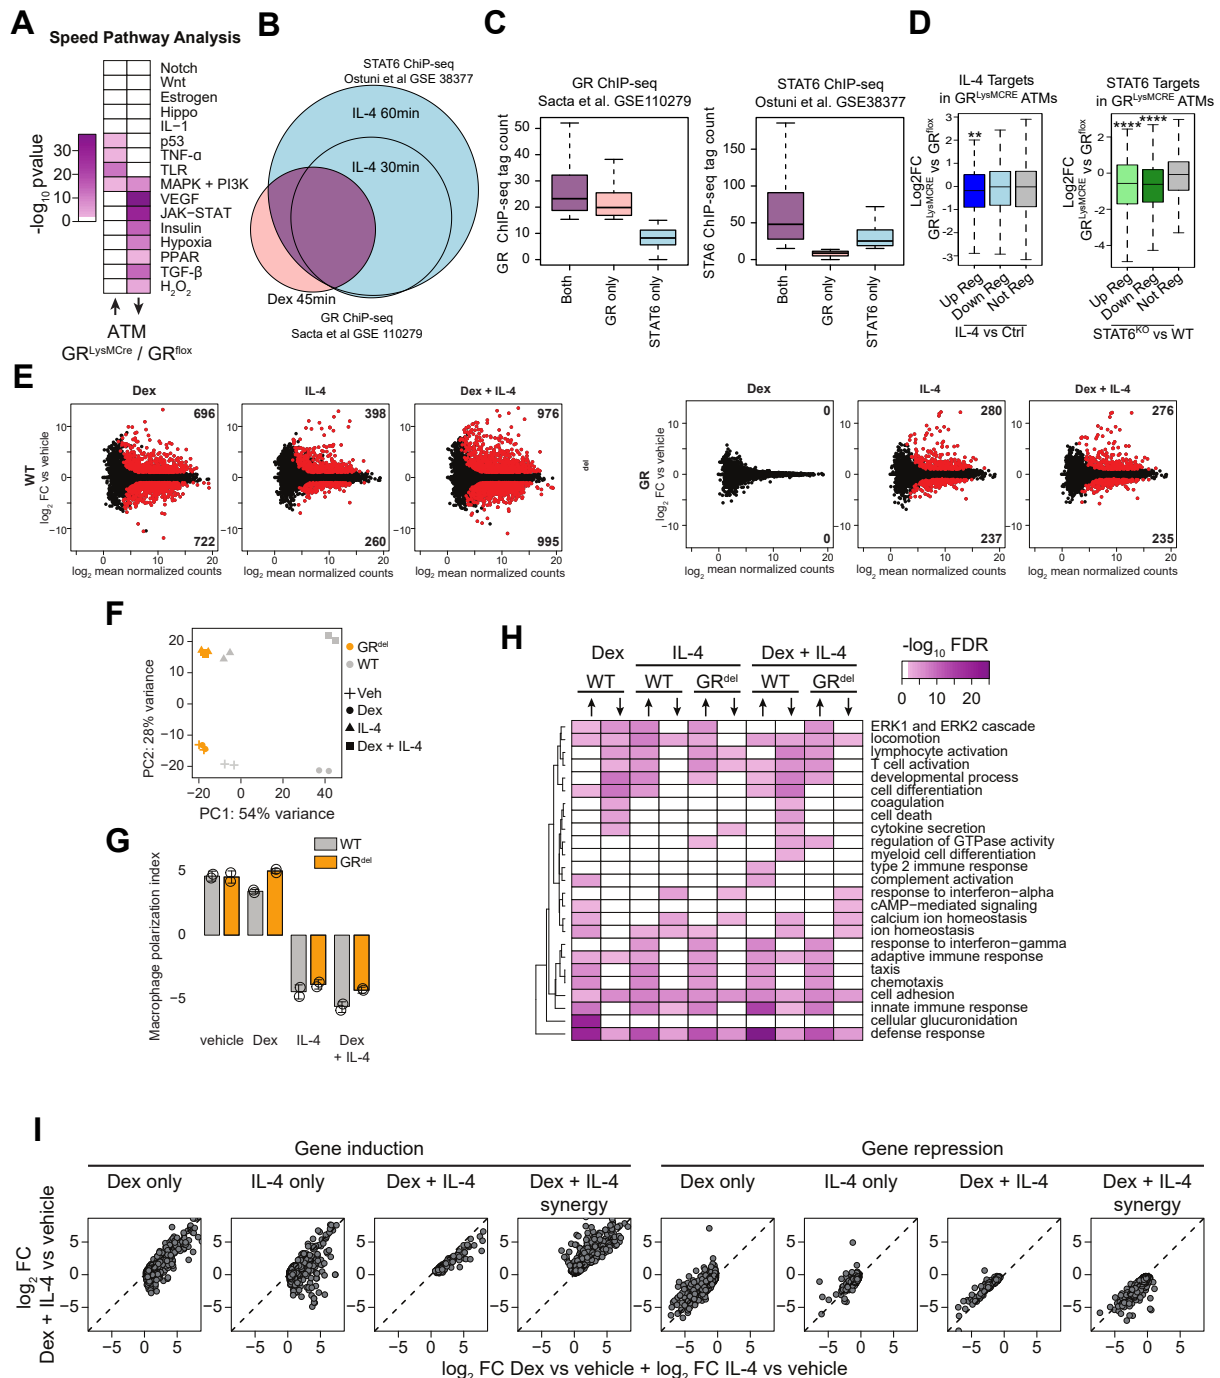

**Supplementary Figure 5. Related to Figure 5.**

(A) Speed pathway analysis of differentially expressed genes from GR<sup>lox</sup> and GR<sup>LysMCre</sup> ATMs in 2A. Significance calculated using Hypergeometric test one-sided (B) Euler plot comparing binding loci of public ChIP-seq data for GR and STAT6. (C) Tag density for GR binding was determine for GR only bound, STAT6 only, GR+STAT6 bound or neither sites from the indicated studies. Tag density of STAT6 was compared for STAT6 only bound, GR only, STAT6+GR bound or neither sites from the indicated studies. (n= GR only: 2602; STAT6 only: 23665; Both: 8813) (D) The log<sub>2</sub>FC between GR<sup>LysMCre</sup> and GR<sup>lox</sup> ATMs for IL-4 or STAT6<sup>KO</sup> up- or down-regulated was compared to non-IL-4 or STAT6<sup>KO</sup> regulated genes. Box plots show median, interquartile range and min/max values excluding outliers. P. value calculated using Wilcoxon rank sum test. (E) MA plots derived from RNA-seq of WT and GR<sup>del</sup> FLDMs treated

with dex, IL-4 or IL-4+dex compared to vehicle. (F) PCA of RNA-seq data derived from S5D. (G) Macrophage polarization index based on RNA-seq counts from WT and GR<sup>del</sup> FLDMs in S5D. (N=2) (H) Gene ontology analysis of genes up or down regulated by dex (only WT, no genes regulated in GR<sup>del</sup>), IL-4 and dex+IL4 compared to vehicle control (GOseq benjamini-hochberg corrected  $p_{adj} < 0.01$ ). (I) Scatter plots of quantification of dex+IL-4 synergism comparing  $\log_2FC$  of dex+IL-4 to  $\log_2FC$  dex +  $\log_2FC$  IL-4. Exact p.value: D: IL4 targets: 0.0050, Stat6 targets: Up-regulated: 6.849e-10, Down-regulated: <2.2e-16



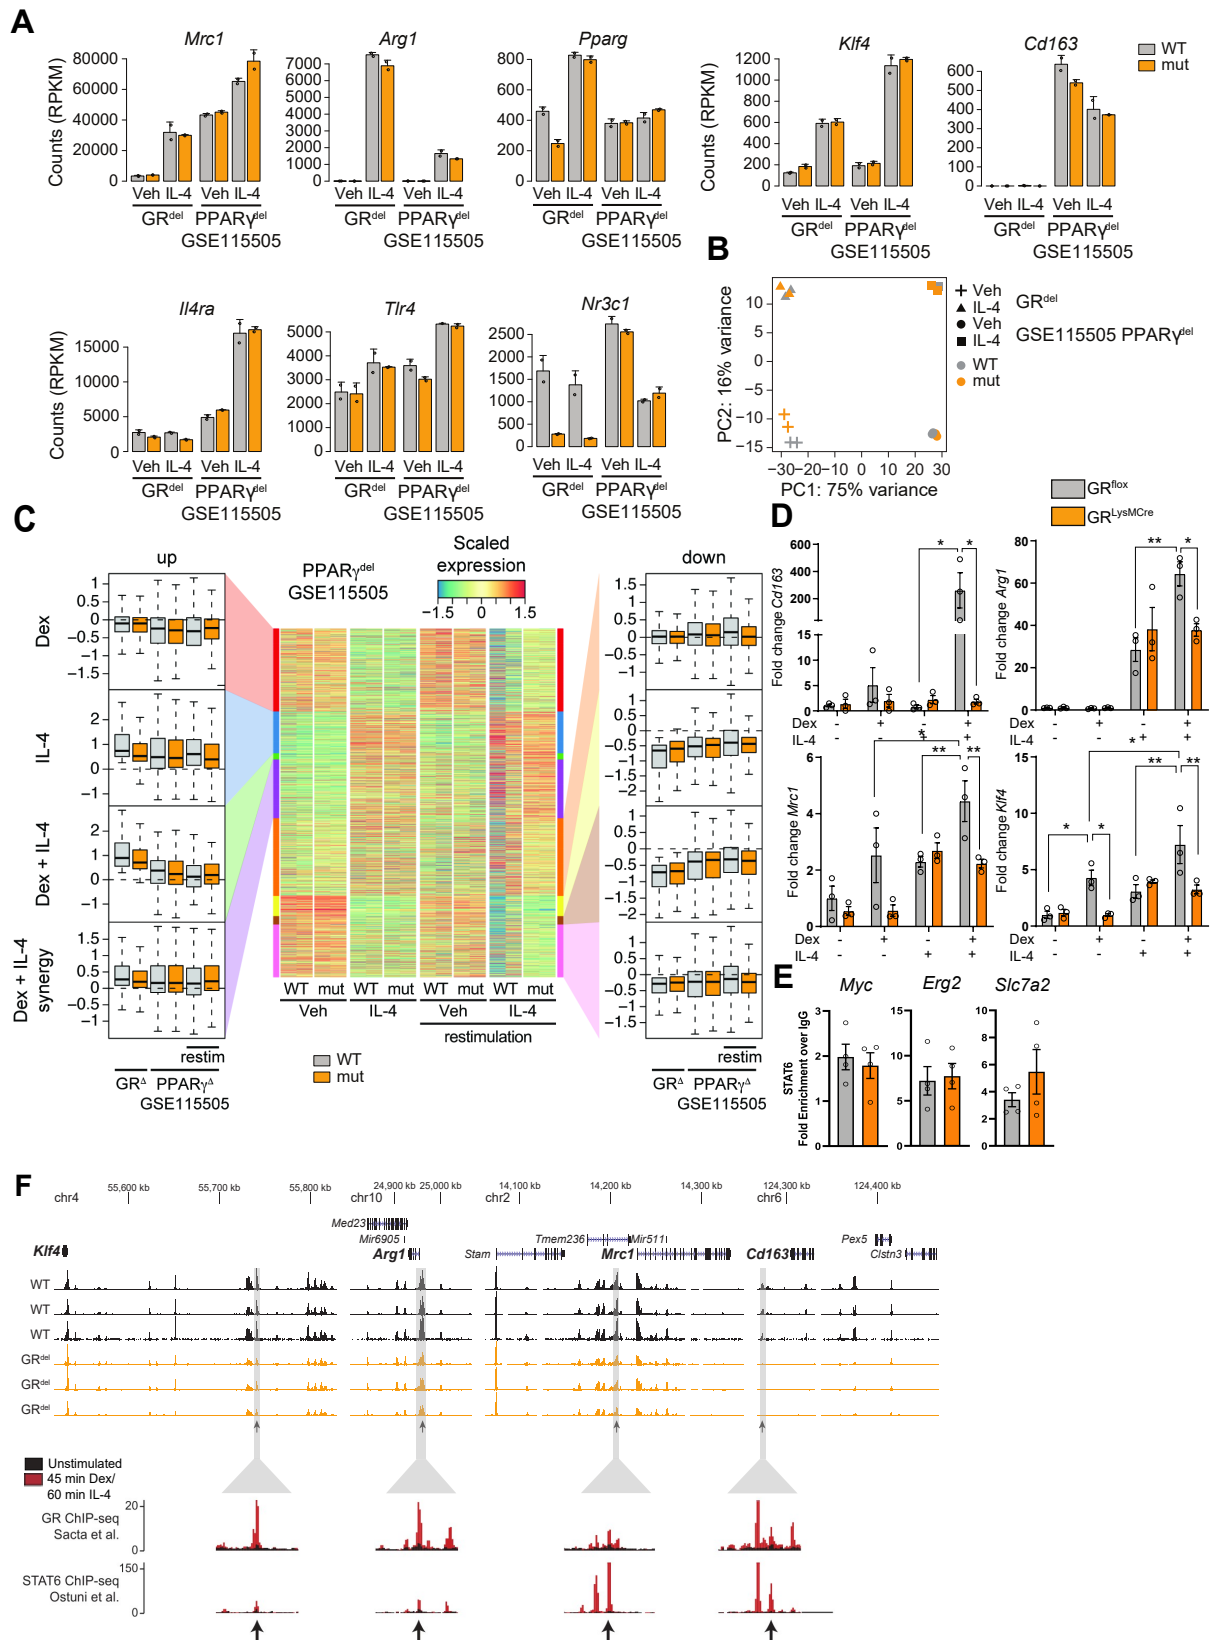

**Supplementary Figure 6 Related to Figure 5.**

(A) Gene expression from  $GR^{\text{del}}$  and  $PPAR\gamma^{\text{del}}$  BMDMs with and without IL-4 treatment. (B) Principal component analysis for the  $GR^{\text{del}}$  and  $PPAR\gamma^{\text{del}}$  BMDMs before and after stimulation

with IL-4. **(C)** Heat map showing gene expression of first and second stimulation with IL-4 in  $\text{PPAR}\gamma^{\text{del}}$  BMDMs for the clusters identified in Figure 4B along with boxplots quantifying the induction and repression levels for GR and  $\text{PPAR}\gamma$  deficiency. **(D)** qPCR validation of dex+IL-4 co-regulated genes (N=3). **(E)** ChIP PCR for STAT6 in  $\text{GR}^{\text{fllox}}$  and  $\text{GR}^{\text{LysMCre}}$  BMDMs upon dex + IL-4 stimulation nearby genes of the IL-4 only activated group (N=4). **(F)** Design for the ChIP-qPCR Primers for their respective genes. Data show mean  $\pm$ SEM. Boxplots show median, IQR and min/max values. Statistical analysis by two-way ANOVA (D), Mann-Whitney test, two-sided (E).  $p < 0.05^*$ ,  $p < 0.01^{**}$ ,  $p < 0.001^{***}$ .

## Supplementary References

1. Sárvári, A. K. *et al.* Plasticity of Epididymal Adipose Tissue in Response to Diet-Induced Obesity at Single-Nucleus Resolution. *Cell Metabolism* **33**, 437-453.e5 (2021).
2. Hildreth, A. D. *et al.* Single-cell sequencing of human white adipose tissue identifies new cell states in health and obesity. *Nat Immunol.* **22**:639-653 (2021).
3. Chang, J. C. *et al.* Adaptive adipose tissue stromal plasticity in response to cold stress and antibody-based metabolic therapy. *Sci Rep* **9**, 8833 (2019).

## Supplementary Table 1

### RT-qPCR

#### Primer

| Name   | Forward                  | Reverse                   |  |
|--------|--------------------------|---------------------------|--|
| Abhd5  | TGGTGTCCCACATCTACATCA    | CAGCGTCCATATTCTGTTTCCA    |  |
| Adgre1 | CCTGGACGAATCCTGTGAAG     | GGTGGGACCACAGAGAGTTG      |  |
| Adipoq | GGAGAGAAAGGAGATGCAGGT    | CTTCTGCCAGGGGTTT          |  |
| Arg1   | CTCCAAGCCAAAGTCCTTAGAG   | AGGAGCTGTCATTAGGGACATC    |  |
| Cd163  | GGCTAGACGAAGTCATCTGCA    | CTTCGTTGGTCAGCCTCAGAGA    |  |
| Cd36   | TGGCAAAGAACAGCAGCAAA     | CACAGTGTGGTCCTCGGG        |  |
| Chil3  | GCTCTCCAGAAGCAATCCTGA    | GGAAGATCCCAGCTGTACGTT     |  |
| Clec7a | CTTCACCTTGGAGGCCATT      | CGCCAAAATGCTAGGGCAC       |  |
| Elovl3 | TTCTCACGCGGGTTAAAAATGG   | GAGCAACAGATAGACGACCAC     |  |
| Elovl6 | TCAGCAAAGCACCCGAAC       | AGCGACCATGTCTTTGTAGGAG    |  |
| Glut4  | CTGTCGCTGGTTTCTCCAAC     | CAGGAGGACGGCAATAGAA       |  |
| Il1b   | GGCTGTGGAGAAGCTGTGGCA    | GGGTCCGACAGCACGAGGCT      |  |
| Insr   | TCTTTCTTCAGGAAGCTACATCTG | TGTCCAAGGCATAAAAAGAATAGTT |  |
| Klf4   | GCAGTCACAAGTCCCCTCTC     | TGGTAAGGTTTCTCGCCTGT      |  |
| Lipe   | CCAGCCTGAGGGCTTACTG      | CTCCATTGACTGTGACATCTCG    |  |
| Mcp1   | AACGCCCACTCACCTGCTG      | TGGGGTCAGCACAGACCTCTC     |  |
| Mertk  | GCTGGCATTTCATGGTGAA      | CATTGTCTGAGCGCTGCAC       |  |
| Mgl1   | ACCATGCTGTGATGCTCTCTG    | CAAACGCCTCGGGGATAACC      |  |
| Mrc1   | CCACAGCATTGAGGAGTTTG     | ACAGCTCATCATTTGGCTCA      |  |
| Nr3c1  | GGCCGCTCAGTGTCTTCTAA     | GCAGAGTTTGGGAGGTGGT       |  |
| Pnpla2 | CAACGCCACTCACATCTACGG    | GGACACCTCAATAATGTTGGCAC   |  |
| Rpl    | CCTGCTGCTCTCAAGGTT       | TGGCTGTCACTGCCTGGTACTT    |  |
| Srebf1 | TGACCCGGCTATTCCGTGA      | CTGGGCTGAGCAATACAGTTC     |  |
| Tnf    | AGGGGCCACCACGCTCTTCT     | TGAGTGTGAGGGTCTGGGCCAT    |  |

### ChIP

#### Primer

|        |                        |                       |  |
|--------|------------------------|-----------------------|--|
| Arg1   | CAAAGGGTTCTGCAGGGGAA   | TCAAGAGCCCTAAGTGCCTG  |  |
| Cd163  | CTCAGTTGGGGTGGAGACTTCA | TGCAAGCTCTAGCCAGACAAC |  |
| Erg2   | CAAATTGGCCATGTGACGGC   | GCAGGTCTTCAATACCCGTGA |  |
| Klf4   | GGTGACAAAGCAGGTGAAGC   | TGTACAAAGCCGGTCTAGCG  |  |
| Mrc1   | TCCAGGTCCATCCATTTGGC   | TGGAAAGAACCCAGATGCCC  |  |
| Myc    | TTGGCAATTCACCTCTCCCC   | GCGCTAGACGCGAGAATATG  |  |
| Slc7a2 | AGCTTGGAGTTAGACACCGC   | CCTGGAGCGTTTGTACGG    |  |
