# Supplementary material for: Glucocorticoid activation of anti-inflammatory macrophages protects against insulin resistance
Source: PubMed Central journal article supplement (PMC10119112; doi:10.1038/s41467-023-37831-z), 2023-04-20
Supplement: 41467_2023_37831_MOESM3_ESM.pdf [file 41467_2023_37831_MOESM3_ESM.pdf]

## Reporting Summary

Nature Portfolio wishes to improve the reproducibility of the work that we publish. This form provides structure for consistency and transparency in reporting. For further information on Nature Portfolio policies, see our [Editorial Policies](#) and the [Editorial Policy Checklist](#).

### Statistics

For all statistical analyses, confirm that the following items are present in the figure legend, table legend, main text, or Methods section.

- |                                     |                                                                                                                                                                                                                                                                                                |
|-------------------------------------|------------------------------------------------------------------------------------------------------------------------------------------------------------------------------------------------------------------------------------------------------------------------------------------------|
| n/a                                 | Confirmed                                                                                                                                                                                                                                                                                      |
| <input type="checkbox"/>            | <input checked="" type="checkbox"/> The exact sample size ( $n$ ) for each experimental group/condition, given as a discrete number and unit of measurement                                                                                                                                    |
| <input type="checkbox"/>            | <input checked="" type="checkbox"/> A statement on whether measurements were taken from distinct samples or whether the same sample was measured repeatedly                                                                                                                                    |
| <input type="checkbox"/>            | <input checked="" type="checkbox"/> The statistical test(s) used AND whether they are one- or two-sided<br><i>Only common tests should be described solely by name; describe more complex techniques in the Methods section.</i>                                                               |
| <input checked="" type="checkbox"/> | <input type="checkbox"/> A description of all covariates tested                                                                                                                                                                                                                                |
| <input type="checkbox"/>            | <input checked="" type="checkbox"/> A description of any assumptions or corrections, such as tests of normality and adjustment for multiple comparisons                                                                                                                                        |
| <input type="checkbox"/>            | <input checked="" type="checkbox"/> A full description of the statistical parameters including central tendency (e.g. means) or other basic estimates (e.g. regression coefficient) AND variation (e.g. standard deviation) or associated estimates of uncertainty (e.g. confidence intervals) |
| <input type="checkbox"/>            | <input checked="" type="checkbox"/> For null hypothesis testing, the test statistic (e.g. $F$ , $t$ , $r$ ) with confidence intervals, effect sizes, degrees of freedom and $P$ value noted<br><i>Give <math>P</math> values as exact values whenever suitable.</i>                            |
| <input checked="" type="checkbox"/> | <input type="checkbox"/> For Bayesian analysis, information on the choice of priors and Markov chain Monte Carlo settings                                                                                                                                                                      |
| <input checked="" type="checkbox"/> | <input type="checkbox"/> For hierarchical and complex designs, identification of the appropriate level for tests and full reporting of outcomes                                                                                                                                                |
| <input checked="" type="checkbox"/> | <input type="checkbox"/> Estimates of effect sizes (e.g. Cohen's $d$ , Pearson's $r$ ), indicating how they were calculated                                                                                                                                                                    |

*Our web collection on [statistics for biologists](#) contains articles on many of the points above.*

### Software and code

Policy information about [availability of computer code](#)

|                 |                                                                                                                                                                                                                                                                                                                                                                                                                                                                                                                                                                                                                                                                                                                                                                            |
|-----------------|----------------------------------------------------------------------------------------------------------------------------------------------------------------------------------------------------------------------------------------------------------------------------------------------------------------------------------------------------------------------------------------------------------------------------------------------------------------------------------------------------------------------------------------------------------------------------------------------------------------------------------------------------------------------------------------------------------------------------------------------------------------------------|
| Data collection | Published micro array expression data were collected using GEO2R and sequencing data were downloaded fastq-dump from SRA.                                                                                                                                                                                                                                                                                                                                                                                                                                                                                                                                                                                                                                                  |
| Data analysis   | HOMER <a href="http://homer.salk.edu/homer/">http://homer.salk.edu/homer/</a><br>goseq <a href="https://bioconductor.org/packages/release/bioc/html/goseq.html">https://bioconductor.org/packages/release/bioc/html/goseq.html</a><br>Bedtools <a href="http://bedtools.readthedocs.io/en/latest/">http://bedtools.readthedocs.io/en/latest/</a><br>STAR aligner <a href="https://github.com/alexdobin/STAR">https://github.com/alexdobin/STAR</a><br>DEseq2 <a href="https://bioconductor.org/packages/release/bioc/html/DESeq2.html">https://bioconductor.org/packages/release/bioc/html/DESeq2.html</a><br>LISA <a href="http://lisa.cistrome.org/">http://lisa.cistrome.org/</a><br><b>In addition we utilized GraphPad Prism 9 ,FlowJo_V10 and Image J 1.53t Fiji</b> |

For manuscripts utilizing custom algorithms or software that are central to the research but not yet described in published literature, software must be made available to editors and reviewers. We strongly encourage code deposition in a community repository (e.g. GitHub). See the Nature Portfolio [guidelines for submitting code & software](#) for further information.

## Data

Policy information about [availability of data](#)

All manuscripts must include a [data availability statement](#). This statement should provide the following information, where applicable:

- Accession codes, unique identifiers, or web links for publicly available datasets
- A description of any restrictions on data availability
- For clinical datasets or third party data, please ensure that the statement adheres to our [policy](#)

Data availability statement:

Raw sequencing and DESeq2 processed data of the ChIP and RNA-seq experiments generated in this work are deposited under the accession number: GSE200371 (<https://www.ncbi.nlm.nih.gov/geo/query/acc.cgi?acc=GSE200371>).

Other datasets used:

GSE160729 (<https://www.ncbi.nlm.nih.gov/geo/query/acc.cgi?acc=GSE160729>)  
 GSE167382 (<https://www.ncbi.nlm.nih.gov/geo/query/acc.cgi?acc=GSE167382>)  
 GSE112396 (<https://www.ncbi.nlm.nih.gov/geo/query/acc.cgi?acc=GSE112396>)  
 GSE119703 (<https://www.ncbi.nlm.nih.gov/geo/query/acc.cgi?acc=GSE119703>)  
 GSE53403 (<https://www.ncbi.nlm.nih.gov/geo/query/acc.cgi?acc=GSE53403>)  
 GSE84000 (<https://www.ncbi.nlm.nih.gov/geo/query/acc.cgi?acc=GSE84000>)  
 GSE63171 (<https://www.ncbi.nlm.nih.gov/geo/query/acc.cgi?acc=GSE63171>)  
 GSE114735 (<https://www.ncbi.nlm.nih.gov/geo/query/acc.cgi?acc=GSE114735>)  
 GSE112396 (<https://www.ncbi.nlm.nih.gov/geo/query/acc.cgi?acc=GSE112396>)  
 GSE115505 (<https://www.ncbi.nlm.nih.gov/geo/query/acc.cgi?acc=GSE115505>)  
 GSE25088 (<https://www.ncbi.nlm.nih.gov/geo/query/acc.cgi?acc=GSE25088>)  
 GSE151015 (<https://www.ncbi.nlm.nih.gov/geo/query/acc.cgi?acc=GSE151015>)  
 GSE110279 (<https://www.ncbi.nlm.nih.gov/geo/query/acc.cgi?acc=GSE110279>)  
 GSE38377 (<https://www.ncbi.nlm.nih.gov/geo/query/acc.cgi?acc=GSE38377>)

## Human research participants

Policy information about [studies involving human research participants and Sex and Gender in Research](#).

Reporting on sex and gender

N/A

Population characteristics

N/A

Recruitment

N/A

Ethics oversight

N/A

Note that full information on the approval of the study protocol must also be provided in the manuscript.

## Field-specific reporting

Please select the one below that is the best fit for your research. If you are not sure, read the appropriate sections before making your selection.

Life sciences  Behavioural & social sciences  Ecological, evolutionary & environmental sciences

For a reference copy of the document with all sections, see [nature.com/documents/nr-reporting-summary-flat.pdf](https://www.nature.com/documents/nr-reporting-summary-flat.pdf)

## Life sciences study design

All studies must disclose on these points even when the disclosure is negative.

Sample size

Animal experiments were designed based with calculations to achieve 80% power with 5% type 1 error. Cell culture experiments had no formal sample size calculation. Sample size determination here was based on previously published work (Stifel, Mol.Met 2022, Mueller, Diabetes 2017)

Data exclusions

Outliers detected using a ROUT test in graphpad prism were excluded from RT-qPCR analyses.

Replication

The HFD feeding experiment represent 2-3 independent experiments. All attempts at replication were successful. In vitro work was completed with a minimum of 2 biological replicates from independent experiments. All attempts at replication were successful.

|               |                                                                                                                                                                                                     |
|---------------|-----------------------------------------------------------------------------------------------------------------------------------------------------------------------------------------------------|
| Randomization | Animals could not be randomized due to genotype requirements. However each cage housed both genotypes and all animals, dependent on genotype were random allocated to a lean or HFD feeding regimen |
| Blinding      | No formal blinding was done during sample collection as the genotypes of the animals were marked on the cages. Analysis of histology, qPCR and other in vitro experiments was performed blinded.    |

## Reporting for specific materials, systems and methods

We require information from authors about some types of materials, experimental systems and methods used in many studies. Here, indicate whether each material, system or method listed is relevant to your study. If you are not sure if a list item applies to your research, read the appropriate section before selecting a response.

### Materials & experimental systems

| n/a                                 | Included in the study                                           |
|-------------------------------------|-----------------------------------------------------------------|
| <input type="checkbox"/>            | <input checked="" type="checkbox"/> Antibodies                  |
| <input type="checkbox"/>            | <input checked="" type="checkbox"/> Eukaryotic cell lines       |
| <input checked="" type="checkbox"/> | <input type="checkbox"/> Palaeontology and archaeology          |
| <input type="checkbox"/>            | <input checked="" type="checkbox"/> Animals and other organisms |
| <input checked="" type="checkbox"/> | <input type="checkbox"/> Clinical data                          |
| <input checked="" type="checkbox"/> | <input type="checkbox"/> Dual use research of concern           |

### Methods

| n/a                                 | Included in the study                              |
|-------------------------------------|----------------------------------------------------|
| <input type="checkbox"/>            | <input checked="" type="checkbox"/> ChIP-seq       |
| <input type="checkbox"/>            | <input checked="" type="checkbox"/> Flow cytometry |
| <input checked="" type="checkbox"/> | <input type="checkbox"/> MRI-based neuroimaging    |

## Antibodies

### Antibodies used

Mouse monoclonal H3K27ac antibody Active Motif #39685; RRID: AB\_2793305 5µg (IP)  
 anti-CD45 coupled beads 10µl/sample  
 anti-CD16/32 (block) 1/300  
 anti-F4/80, coupled beads 10µl/sample  
 anti-CD11b FITC 1/300  
 anti-GR antibody 3µg (IP)  
 anti-STAT6 1/50 (IP)  
 TCRb PerCpCy5.5 1/400  
 TCRgd APC 1/400  
 CD4 PeCy7 1/400  
 CD8 APC-eFluor 780 1/400  
 CD11c PerCpCy5.5 1/400  
 CD19 PeCy7 1/400  
 CD11b PerCpCy5.5 1/400  
 CD11b APC 1/400  
 CD11b AF488 1/400  
 F4/80 PeCy7 1/400  
 CD206 FITC 1/400  
 anti-F4/80 (SCBT) 1/100  
 anti-F4/80 (CellSignaling) 1/100  
 anti-CD206 1/300  
 anti-CD11c 1/200

### Validation

The antibodies used in this study are validated by their respective manufacturers and are commercially available:  
 H3K27ac: [https://ngsseq.org/cert\\_reports/Hela\\_H3K27ac\\_Homo%20sapiens\\_Active%20Motif\\_39685\\_16611003\\_monoclonal.pdf](https://ngsseq.org/cert_reports/Hela_H3K27ac_Homo%20sapiens_Active%20Motif_39685_16611003_monoclonal.pdf)  
 anti-CD45 MicroBeads <https://www.miltenyibiotec.com/DE-en/products/cd45-microbeads-mouse.html>  
 anti-CD16/32 <https://www.thermofisher.com/antibody/product/CD16-CD32-Antibody-clone-93-Monoclonal/14-0161-82>  
 anti-F4/80, Miltenyi <https://www.miltenyibiotec.com/DE-en/products/anti-f4-80-microbeads-ultrapure-mouse.html>  
 anti-CD11b FITC <https://www.thermofisher.com/antibody/product/CD11b-Antibody-clone-ICRF44-Monoclonal/11-0118-42>  
 anti-GR antibody (IP) <https://www.ptglab.com/products/NR3C1-Antibody-24050-1-AP.htm>  
 anti-STAT6 (IP) <https://www.cellsignal.com/products/primary-antibodies/stat6-d3h4-rabbit-mab/5397>  
 TCRb PerCpCy5.5 <https://www.thermofisher.com/antibody/product/TCR-beta-Antibody-clone-H57-597-Monoclonal/45-5961-82>  
 TCRgd APC <https://www.thermofisher.com/antibody/product/TCR-gamma-delta-Antibody-clone-eBioGL3-GL-3-GL3-Monoclonal/17-5711-82>  
 CD4 PeCy7 <https://www.thermofisher.com/antibody/product/CD4-Antibody-clone-GK1-5-Monoclonal/25-0041-82>  
 CD8 APC-eFluor 780 <https://www.thermofisher.com/antibody/product/CD8a-Antibody-clone-53-6-7-Monoclonal/47-0081-82>  
 CD11c PerCpCy5.5 <https://www.thermofisher.com/antibody/product/CD11c-Antibody-clone-N418-Monoclonal/45-0114-82>  
 CD19 PeCy7 <https://www.thermofisher.com/antibody/product/CD19-Antibody-clone-eBio1D3-1D3-Monoclonal/25-0193-82>  
 CD11b PerCpCy5.5 <https://www.thermofisher.com/antibody/product/CD11b-Antibody-clone-M1-70-Monoclonal/45-0112-82>  
 CD11b APC <https://www.thermofisher.com/antibody/product/CD11b-Antibody-clone-M1-70-Monoclonal/17-0112-82>  
 CD11b AF488 <https://www.thermofisher.com/antibody/product/CD11b-Antibody-clone-M1-70-Monoclonal/53-0112-82>

F4/80 PeCy7 <https://www.thermofisher.com/antibody/product/F4-80-Antibody-clone-BM8-Monoclonal/25-4801-82>  
 CD206 FITC <https://www.biolegend.com/fr-ch/products/fitc-anti-human-cd206-mmr-antibody-2993>  
 anti-F4/80 <https://www.scbt.com/p/f4-80-antibody-m-300>  
 anti-F4/80 <https://www.cellsignal.com/products/primary-antibodies/f4-80-d2s9r-xp-rabbit-mab/70076>  
 anti-CD206 <https://www.scbt.com/p/cd206-antibody-d-1>  
 anti-CD11c <https://www.cellsignal.com/products/primary-antibodies/cd11c-d1v9y-rabbit-mab/97585>

## Eukaryotic cell lines

Policy information about [cell lines and Sex and Gender in Research](#)

|                                                                      |                                                          |
|----------------------------------------------------------------------|----------------------------------------------------------|
| Cell line source(s)                                                  | ATTC (3T3-L1)                                            |
| Authentication                                                       | Non of the cell lines were authenticated.                |
| Mycoplasma contamination                                             | Cell lines were not tested for mycoplasma contamination. |
| Commonly misidentified lines<br>(See <a href="#">ICLAC</a> register) | 3T3 L1                                                   |

## Animals and other research organisms

Policy information about [studies involving animals](#); [ARRIVE guidelines](#) recommended for reporting animal research, and [Sex and Gender in Research](#)

|                         |                                                                                                                                                                                                                                                                                                   |
|-------------------------|---------------------------------------------------------------------------------------------------------------------------------------------------------------------------------------------------------------------------------------------------------------------------------------------------|
| Laboratory animals      | Mouse (GRLysmCre and GRclec4fCre mice), C57BL/6 background, HFD feeding for up to 29 weeks starting from age 8 to 12 weeks<br>Mice were housed at a 12/12 dark/light cycle. Humidity was controlled to be between 55-65%. Ambient temperature was set to 22° C.                                   |
| Wild animals            | Study did not involve wild animals                                                                                                                                                                                                                                                                |
| Reporting on sex        | All experiments were performed in male mice.                                                                                                                                                                                                                                                      |
| Field-collected samples | Study did not involve samples collected from the field.                                                                                                                                                                                                                                           |
| Ethics oversight        | All animal experiments were performed in accordance with accepted standards of animal welfare and with permission of the responsible authorities of the Thüringer Landesamt für Lebensmittelsicherheit und Verbraucherschutz and the Regierungspräsidium Tübingen (License 1436 and License 1332) |

Note that full information on the approval of the study protocol must also be provided in the manuscript.

## ChIP-seq

### Data deposition

- Confirm that both raw and final processed data have been deposited in a public database such as [GEO](#).
- Confirm that you have deposited or provided access to graph files (e.g. BED files) for the called peaks.

|                                                                    |                                                                                                                                                                                                                                                                                                                                                                                                                                                                                                                                                                                                                                                                                                            |
|--------------------------------------------------------------------|------------------------------------------------------------------------------------------------------------------------------------------------------------------------------------------------------------------------------------------------------------------------------------------------------------------------------------------------------------------------------------------------------------------------------------------------------------------------------------------------------------------------------------------------------------------------------------------------------------------------------------------------------------------------------------------------------------|
| Data access links<br><i>May remain private before publication.</i> | To review GEO accession GSE200371:<br>Go to <a href="https://www.ncbi.nlm.nih.gov/geo/query/acc.cgi?acc=GSE200371">https://www.ncbi.nlm.nih.gov/geo/query/acc.cgi?acc=GSE200371</a><br>Enter token wdwbocystbmvof into the box                                                                                                                                                                                                                                                                                                                                                                                                                                                                             |
| Files in database submission                                       | GSE200371_RNA_ATM_DESeq2.txt.gz<br>GSM6032199_RNA_ATM_GRflox_1_R1.fq.gz<br>GSM6032199_RNA_ATM_GRflox_1_R2.fq.gz<br>GSM6032200_RNA_ATM_GRflox_2_R1.fq.gz<br>GSM6032200_RNA_ATM_GRflox_2_R2.fq.gz<br>GSM6032201_RNA_ATM_GRLysMCre_1_R1.fq.gz<br>GSM6032201_RNA_ATM_GRLysMCre_1_R2.fq.gz<br>GSM6032202_RNA_ATM_GRLysMCre_2_R1.fq.gz<br>GSM6032202_RNA_ATM_GRLysMCre_2_R2.fq.gz<br><br>GSE200371_RNA_Mac_DESeq2.txt.gz<br>GSM6032203_RNA_Mac_wt_veh_1_R1.fq.gz<br>GSM6032203_RNA_Mac_wt_veh_1_R2.fq.gz<br>GSM6032204_RNA_Mac_wt_veh_2_R1.fq.gz<br>GSM6032204_RNA_Mac_wt_veh_2_R2.fq.gz<br>GSM6032205_RNA_Mac_wt_dex_1_R1.fq.gz<br>GSM6032205_RNA_Mac_wt_dex_1_R2.fq.gz<br>GSM6032206_RNA_Mac_wt_dex_2_R1.fq.gz |

GSM6032206 RNA\_Mac\_wt\_dex\_2\_R2.fq.gz  
 GSM6032207 RNA\_Mac\_wt\_il4\_1\_R1.fq.gz  
 GSM6032207 RNA\_Mac\_wt\_il4\_1\_R2.fq.gz  
 GSM6032208 RNA\_Mac\_wt\_il4\_2\_R1.fq.gz  
 GSM6032208 RNA\_Mac\_wt\_il4\_2\_R2.fq.gz  
 GSM6032209 RNA\_Mac\_wt\_il4dex\_1\_R1.fq.gz  
 GSM6032209 RNA\_Mac\_wt\_il4dex\_1\_R2.fq.gz  
 GSM6032210 RNA\_Mac\_wt\_il4dex\_2\_R1.fq.gz  
 GSM6032210 RNA\_Mac\_wt\_il4dex\_2\_R2.fq.gz  
 GSM6032211 RNA\_Mac\_GRnull\_veh\_1\_R1.fq.gz  
 GSM6032211 RNA\_Mac\_GRnull\_veh\_1\_R2.fq.gz  
 GSM6032212 RNA\_Mac\_GRnull\_veh\_2\_R1.fq.gz  
 GSM6032212 RNA\_Mac\_GRnull\_veh\_2\_R2.fq.gz  
 GSM6032213 RNA\_Mac\_GRnull\_dex\_1\_R1.fq.gz  
 GSM6032213 RNA\_Mac\_GRnull\_dex\_1\_R2.fq.gz  
 GSM6032214 RNA\_Mac\_GRnull\_dex\_2\_R1.fq.gz  
 GSM6032214 RNA\_Mac\_GRnull\_dex\_2\_R2.fq.gz  
 GSM6032215 RNA\_Mac\_GRnull\_il4\_1\_R1.fq.gz  
 GSM6032215 RNA\_Mac\_GRnull\_il4\_1\_R2.fq.gz  
 GSM6032216 RNA\_Mac\_GRnull\_il4\_2\_R1.fq.gz  
 GSM6032216 RNA\_Mac\_GRnull\_il4\_2\_R2.fq.gz  
 GSM6032217 RNA\_Mac\_GRnull\_il4dex\_1\_R1.fq.gz  
 GSM6032217 RNA\_Mac\_GRnull\_il4dex\_1\_R2.fq.gz  
 GSM6032218 RNA\_Mac\_GRnull\_il4dex\_2\_R1.fq.gz  
 GSM6032218 RNA\_Mac\_GRnull\_il4dex\_2\_R2.fq.gz

GSE200371\_H3K27ac\_Mac\_DEseq2.txt.gz  
 GSM6032219 H3K27ac\_Mac\_GRflox\_1\_R1.fq.gz  
 GSM6032219 H3K27ac\_Mac\_GRflox\_1\_R2.fq.gz  
 GSM6032220 H3K27ac\_Mac\_GRflox\_2\_R1.fq.gz  
 GSM6032220 H3K27ac\_Mac\_GRflox\_2\_R2.fq.gz  
 GSM6032221 H3K27ac\_Mac\_GRflox\_3\_R1.fq.gz  
 GSM6032221 H3K27ac\_Mac\_GRflox\_3\_R2.fq.gz  
 GSM6032222 H3K27ac\_Mac\_GRLysMCre\_1\_R1.fq.gz  
 GSM6032222 H3K27ac\_Mac\_GRLysMCre\_1\_R2.fq.gz  
 GSM6032223 H3K27ac\_Mac\_GRLysMCre\_2\_R1.fq.gz  
 GSM6032223 H3K27ac\_Mac\_GRLysMCre\_2\_R2.fq.gz  
 GSM6032224 H3K27ac\_Mac\_GRLysMCre\_3\_R1.fq.gz  
 GSM6032224 H3K27ac\_Mac\_GRLysMCre\_3\_R2.fq.gz

Genome browser session  
 (e.g. [UCSC](https://genome.ucsc.edu))

<https://genome.ucsc.edu/s/dr.arauch/Ulm>

## Methodology

### Replicates

RNA-seq experiments have been replicated twice and ChIP-seq experiments were replicated three times, all of them with cells from independent mice. Replicate agreement was determined by performing a Pearson's correlation over the read density values.

RNA-seq ATM based on on tag density in gene bodies from GSE200371\_RNA\_ATM\_DESeq2.txt.gz: GRflox (GSM6032199 - GSM6032200: 0.984), GRLysMCre (GSM6032201 - GSM6032202: 0.954)

RNA-seq Mac based on on tag density in gene bodies from GSE200371\_RNA\_Mac\_DESeq2.txt.gz: wt veh (GSM6032203 - GSM6032204: 0.998), wt dex (GSM6032205 - GSM6032206: 0.986), wt il4 (GSM6032207 - GSM6032208: 0.989), wt il4 + dex (GSM6032209 - GSM6032210: 0.996), GRnull veh (GSM6032211 - GSM6032212: 0.988), GRnull dex (GSM6032213 - GSM6032214: 0.994), GRnull il4 (GSM6032215 - GSM6032216: 0.996), GRnull il4 + dex (GSM6032217 - GSM6032218: 0.996)

Correlation H3K27ac ChIP-seq based on tag density in peak file coordinates in GSE200371\_H3K27ac\_Mac\_DEseq2.txt.gz: GRflox (GSM6032219 - GSM6032220: 0.993; GSM6032219 - GSM6032221: 0.985; GSM6032220 - GSM6032221: 0.994), GRLysMCre (GSM6032222 - GSM6032223: 0.996; GSM6032222 - GSM6032224: 0.994; GSM6032223 - GSM6032224: 0.994)

### Sequencing depth

All Samples were paired end sequencing  
 Sample; Sequencing depth; Uniquely aligned; fragmentLengthEstimate (STAR)

GSM6032199 RNA\_ATM\_GRflox\_1; 20,242,533; 15,913,580; 142  
 GSM6032200 RNA\_ATM\_GRflox\_2; 31,852,360; 25,253,069; 143  
 GSM6032201 RNA\_ATM\_GRLysMCre\_1; 21,073,067; 16,861,514; 148  
 GSM6032202 RNA\_ATM\_GRLysMCre\_2; 22,389,277; 17,331,915; 146

GSM6032203 RNA\_Mac\_wt\_veh\_1; 27,690,983; 23,933,181; 639  
 GSM6032204 RNA\_Mac\_wt\_veh\_2; 22,071,264; 18,982,910; 764  
 GSM6032205 RNA\_Mac\_wt\_dex\_1; 22,661,812; 19,759,681; 463  
 GSM6032206 RNA\_Mac\_wt\_dex\_2; 23,924,882; 20,673,411; 601  
 GSM6032207 RNA\_Mac\_wt\_il4\_1; 17,139,658; 14,524,116; 783  
 GSM6032208 RNA\_Mac\_wt\_il4\_2; 24,455,574; 21,106,762; 453  
 GSM6032209 RNA\_Mac\_wt\_il4dex\_1; 17,801,555; 15,465,806; 608  
 GSM6032210 RNA\_Mac\_wt\_il4dex\_2; 25,782,272; 22,361,065; 463  
 GSM6032211 RNA\_Mac\_GRnull\_veh\_1; 20,640,739; 17,948,862; 619  
 GSM6032212 RNA\_Mac\_GRnull\_veh\_2; 21,908,933; 18,837,070; 594  
 GSM6032213 RNA\_Mac\_GRnull\_dex\_1; 22,586,027; 19,556,134; 190  
 GSM6032214 RNA\_Mac\_GRnull\_dex\_2; 21,913,666; 18,922,775; 740  
 GSM6032215 RNA\_Mac\_GRnull\_il4\_1; 19,565,154; 16,798,108; 797  
 GSM6032216 RNA\_Mac\_GRnull\_il4\_2; 23,975,954; 20,699,624; 654  
 GSM6032217 RNA\_Mac\_GRnull\_il4dex\_1; 17,002,299; 14,654,148; 631  
 GSM6032218 RNA\_Mac\_GRnull\_il4dex\_2; 25,658,955; 22,021,047; 578

GSM6032219 H3K27ac\_Mac\_GRflox\_1; 19,811,337; 17,541,935; 217  
 GSM6032220 H3K27ac\_Mac\_GRflox\_2; 17,751,958; 15,490,952; 213  
 GSM6032221 H3K27ac\_Mac\_GRflox\_3; 5,060,117; 4,559,578; 225  
 GSM6032222 H3K27ac\_Mac\_GRLysMCre\_1; 11,033,297; 9,862,429; 235  
 GSM6032223 H3K27ac\_Mac\_GRLysMCre\_2; 14,467,203; 13,113,455; 221  
 GSM6032224 H3K27ac\_Mac\_GRLysMCre\_3; 20,575,555; 18,095,044; 217

Antibodies

Mouse monoclonal H3K27ac antibody Active Motif #39685; Clone MABI 0309; RRID: AB\_2793305

Peak calling parameters

```
# Find peaks with histone option
findPeaks H3K27ac_WT_1_star.Aligned.out.TD/ -style histone -o WT_1.txt
findPeaks H3K27ac_WT_2_star.Aligned.out.TD/ -style histone -o WT_2.txt
findPeaks H3K27ac_WT_3_star.Aligned.out.TD/ -style histone -o WT_3.txt
findPeaks H3K27ac_KO_1_star.Aligned.out.TD/ -style histone -o KO_1.txt
findPeaks H3K27ac_KO_2_star.Aligned.out.TD/ -style histone -o KO_2.txt
findPeaks H3K27ac_KO_3_star.Aligned.out.TD/ -style histone -o KO_3.txt

# merge wt replicates (keep only those in all three replicates)
mergePeaks WT_*.txt -d given -prefix Merge_WT

# merge ko replicates (keep only those in all three replicates)
mergePeaks KO_*.txt -d given -prefix Merge_KO

# merge wt and ko file, make to bed file and remove blacklisted peaks
mergePeaks Merge_WT_WT_1.txt_WT_2.txt_WT_3.txt Merge_KO_KO_1.txt_KO_2.txt_KO_3.txt > Peaks_H3K27ac.txt
awk '{print $2"\t"$3"\t"$4"\t"$1}' Peaks_H3K27ac.txt > Peaks_H3K27ac_tmp.bed
sed '1d' Peaks_H3K27ac_tmp.bed > Peaks_H3K27ac.bed
bedtools intersect -v -a Peaks_H3K27ac.bed -b mm10-blacklist.v2.bed > Peaks_H3K27ac_blacklisted.bed

# Annotate TagDir for diff H3K27ac levels
annotatePeaks.pl Peaks_H3K27ac_blacklisted.bed mm10 -noadj -d H3K27ac_WT*.TD H3K27ac_KO*.TD > TagCounts_H3K27ac.txt
```

Data quality

IP-efficiency (tags in peaks compared to background) was used as quality measurement and Pearson's correlation for read density within peak region was used to control replicates (see above)

GSM6032219 H3K27ac\_Mac\_GRflox\_1: 9.40 %  
 GSM6032220 H3K27ac\_Mac\_GRflox\_2: 7.72 %  
 GSM6032221 H3K27ac\_Mac\_GRflox\_3: 12.32 %  
 GSM6032222 H3K27ac\_Mac\_GRLysMCre\_1: 10.48 %  
 GSM6032223 H3K27ac\_Mac\_GRLysMCre\_2: 11.46 %  
 GSM6032224 H3K27ac\_Mac\_GRLysMCre\_3: 7.26 %

Software

HOMER <http://homer.salk.edu/homer/>  
 Bedtools <http://bedtools.readthedocs.io/en/latest/>  
 STAR aligner <https://github.com/alexdobin/STAR>

## Flow Cytometry

### Plots

Confirm that:

- The axis labels state the marker and fluorochrome used (e.g. CD4-FITC).
- The axis scales are clearly visible. Include numbers along axes only for bottom left plot of group (a 'group' is an analysis of identical markers).
- All plots are contour plots with outliers or pseudocolor plots.
- A numerical value for number of cells or percentage (with statistics) is provided.

### Methodology

Sample preparation

SVF or co-cultures were harvested as described in the methods section. After erylysis, cells were resuspended in FACS buffer (PBS 2% FCS) and counted. Cell surface antigens were blocked with Anti-Mouse CD16/CD32 (14-0161, eBioscience) and stained, details for each antibody can be found in the methods. Single stained controls were used for compensation.

Instrument

Canto II or LSR II

Software

BD FACS Diva was used for acquisition, FlowJo was used for analysis and Graphpad Prism for statistics.

Cell population abundance

Macrophages, the main population of interest were around 15% of all live cells. Details of individual populations can be found in the manuscript.

Gating strategy

SSC-A FSC-A was used to identify cells, singlets were identified using FSC-H and FSC-A. DAPI was used to exclude dead cells. Macrophages were defined as CD11b+ F4/80+ with polarisation markers CD206 and CD11c. Dendritic cells were identified as CD11b+ F4/80- CD11c+ cells. B cells defined as TCR-b- CD-19+. T cells as: TCR-b+ followed by CD8 and CD4+.

- Tick this box to confirm that a figure exemplifying the gating strategy is provided in the Supplementary Information.
